# Supplementary material for: h-BN-TiO2Nanocomposite for Photocatalytic Applications
Source: Hindawi journal article supplement (doi:10.1155/2016/4580516), 2016-01-01
Supplement: f1 [file 4580516.f1.pdf]

## Supplement Information

### h-BN-TiO<sub>2</sub> nanocomposite for photocatalytic applications

\*Václav Štengl, Jiří Henych, Michaela Slušná

[stengl@iic.cas.cz](mailto:stengl@iic.cas.cz)

<sup>1</sup>Department of Materials Chemistry, Institute of Inorganic Chemistry AS CR v.v.i.,

250 68 Řež, Czech Republic

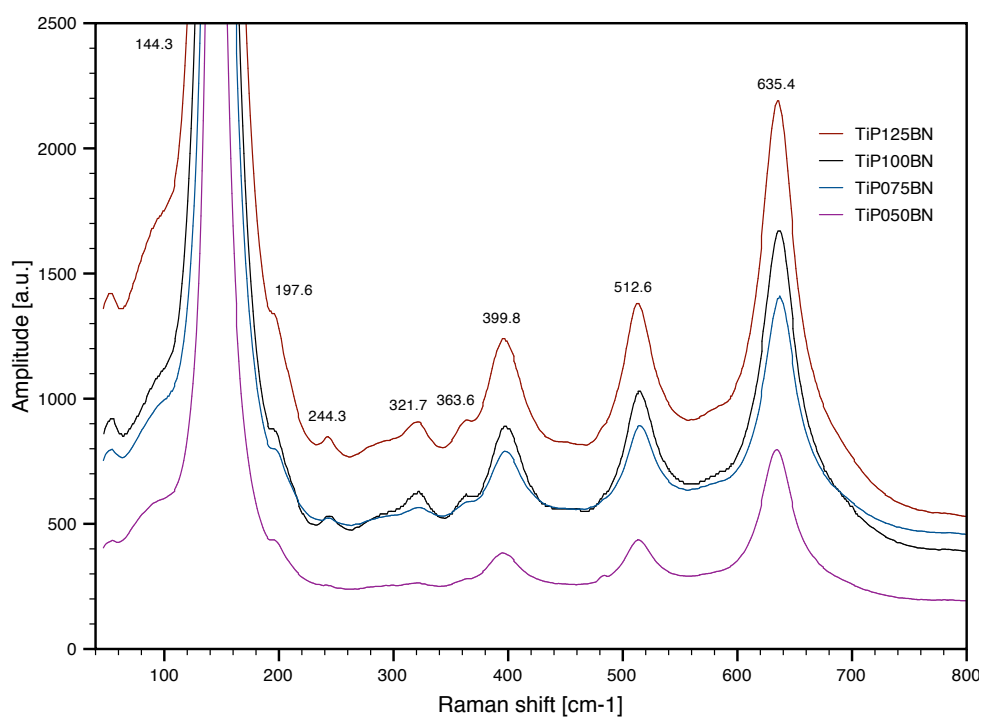

Figure S1. Raman spectra of prepared h-BN-TiO<sub>2</sub> nanomaterials

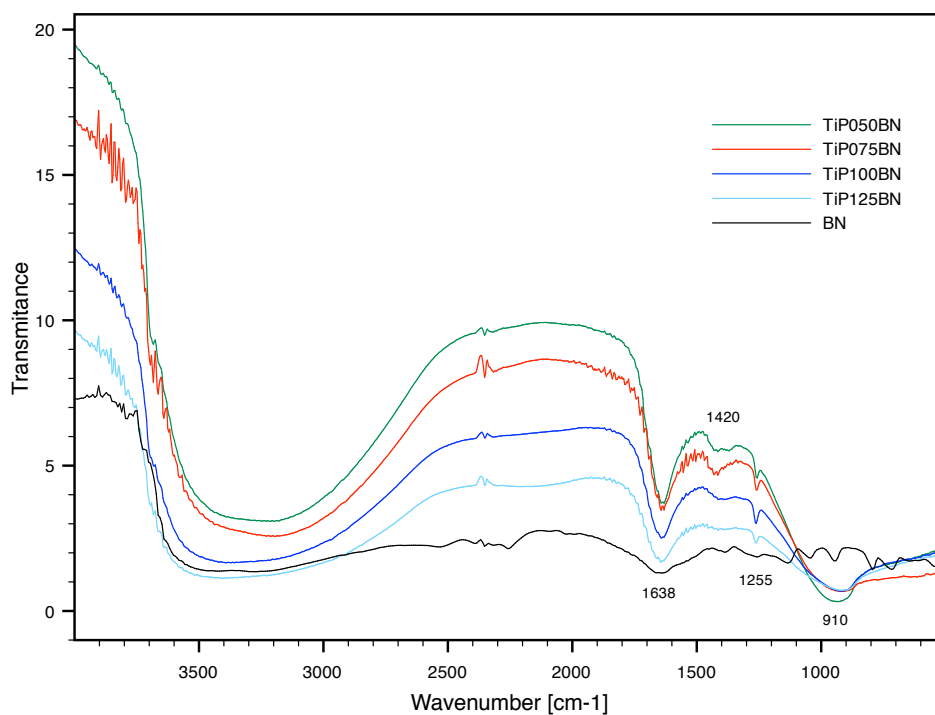

Figure S2. Infrared spectra of prepared h-BN-TiO<sub>2</sub> nanomaterials

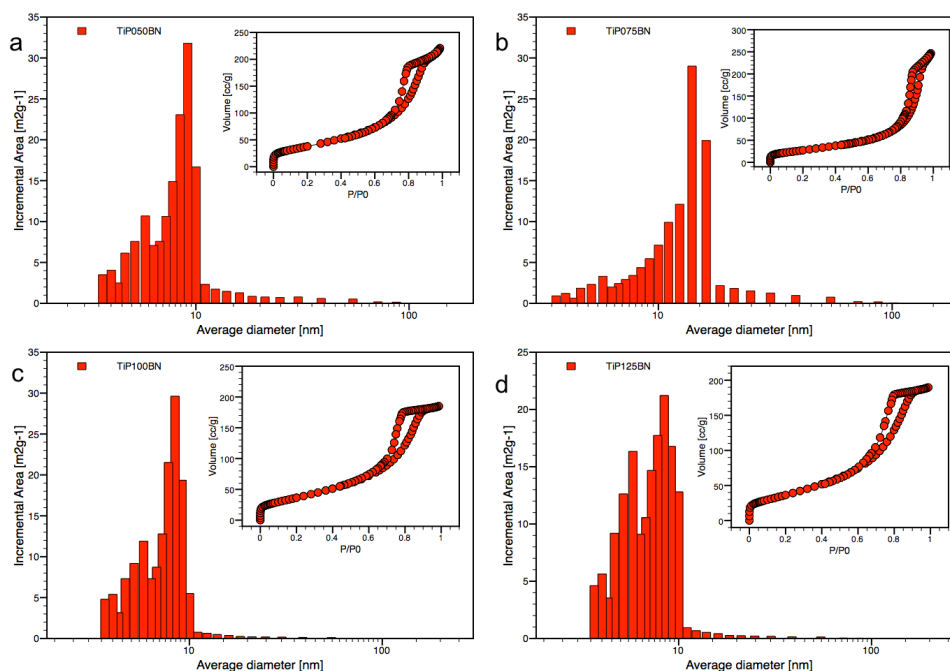

Figure S3. Pore size distribution of prepped samples a) TiP050BN, b) TiP075BN, c) TiP100BN and TiP125BN. Inset nitrogen adsorption/desorption isotherms

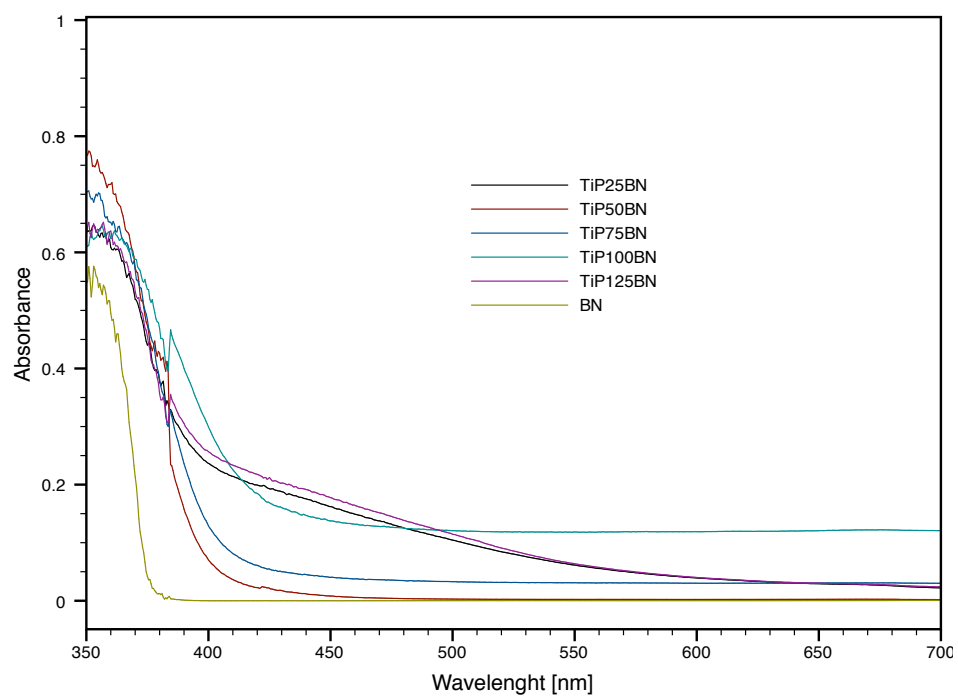

Figure S4. The absorbance of h-BN-TiO<sub>2</sub> nanocomposites

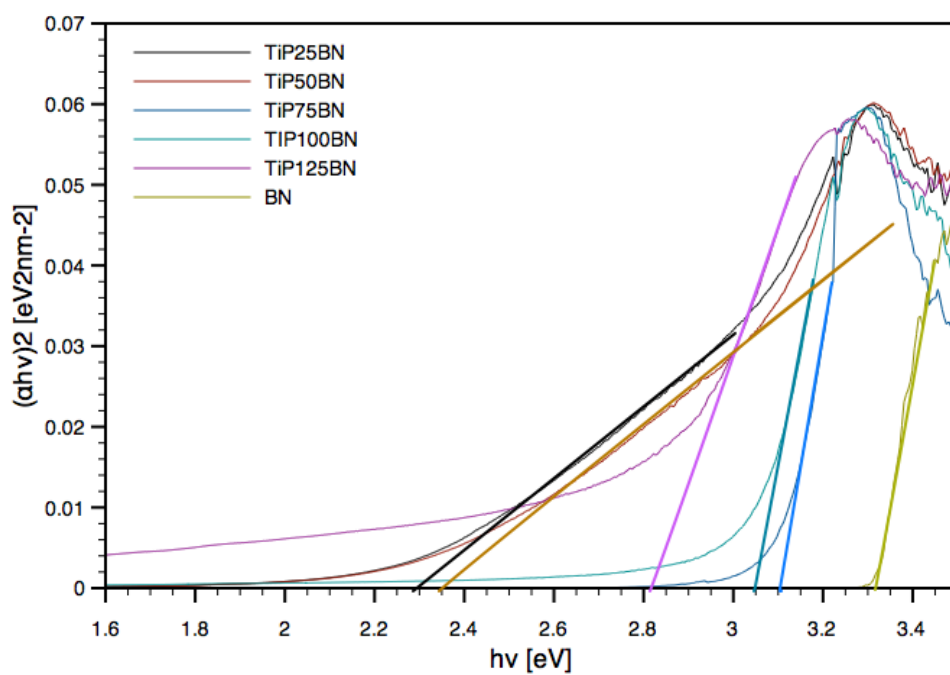

Figure S5. The band gap energy of h-BN-TiO<sub>2</sub> nanocomposites
